# Corrections

*Validated method for total homocysteine determination*

By B. P. SOLOMON, C. DUDA and  
A. C. MANN

Volume 26 No. 1 (1998) S21

The following correspondence address should have appeared: BAS Technicol Ltd., Riverside, Mountbatten Way, Congleton, Cheshire CW12 1DY.

*Mechanisms of maternofetal exchange across the human placenta*

By C. P. SIBLEY, T. J. BIRDSEY,  
P. BROWNBILL, L. H. CLARSON,  
I. DOUGHTY, J. D. GLAZIER,  
S. L. GREENWOOD, J. HUGHES,  
T. JANSSON, P. MYLONA,  
D. M. NELSON and T. POWELL

Volume 26 No. 2 (1998) p. 86

The address affiliations should have been assigned as follows: C. P. Sibley, T. J. Birdsey, P. Brownbill, L. H. Clarson, I. Doughty, J. D. Glazier, S. L. Greenwood, J. Hughes and P. Mylona at the Department of Child Health, University of Manchester, St. Mary's Hospital; T. Jansson and T. Powell at the Department of Physiology, University of Göteborg; and D. M. Nelson at the Department of Obstetrics and Gynaecology, Washington University School of Medicine, St. Louis.

*Role of Glut1 glucose transporter activation in stimulation of glucose transport by A231876 and TPA*

By M. H. KOSEOGLU and F. I. BEIGI

Volume 26 No. 3 (1998) S289

In the title, 'A231876' should have appeared as 'A23187'.

*Role of apolipoprotein E in modulating neurite outgrowth: potential effect of intracellular apolipoprotein E*

By R. E. PITAS, Z.-S. JI,  
K. W. WEISGRABER and R. W. MAHLEY

Volume 26 No. 2 (1998) p. 258

In the third paragraph, line 12, 'since LDL (the other ligand...)' should have read 'since LDL and apoB (the other ligand...)'.

*Inborn errors of ketogenesis*

By G. A. MITCHELL, S. P. WANG,  
L. ASHMARINA, M. F. ROBERT,  
G. BOUCHARD, N. LAURIN,  
S. KASSOVSKA-BRATINOVA  
and Y. BOUKAFTANE

Volume 26 No. 2 (1998) p. 136

The fifth author listed, G. Bouchard, should have appeared as L. Bouchard.
